# Supplementary material for: Phonon vortices at heavy impurities in two-dimensional materials
Source: Royal Society of Chemistry journal article supplement (doi:10.1039/d3nh00433c), 2023-12-07
Supplement: d3nh00433c1.pdf [file d3nh00433c1.pdf]

## Electronic Supplementary Information

### Phonon vortices at heavy impurities in two-dimensional materials

De-Liang Bao<sup>1</sup>, Mingquan Xu<sup>2</sup>, Ao-Wen Li<sup>2</sup>, Gang Su<sup>2,3</sup>, Wu Zhou<sup>2</sup>, and Sokrates T. Pantelides<sup>1,4,\*</sup>

<sup>1</sup>*Department of Physics and Astronomy, Vanderbilt University, Nashville, Tennessee 37235, U.S.A.*

<sup>2</sup>*School of Physical Sciences and CAS Key Laboratory of Vacuum Physics, University of the Chinese Academy of Sciences, Beijing 100049, P. R. China*

<sup>3</sup>*Kavli Institute for Theoretical Sciences, University of the Chinese Academy of Sciences, Beijing, P. R. China*

<sup>4</sup>*Department of Electrical and Computer Engineering, Vanderbilt University, Nashville, Tennessee 37235, U.S.A.*

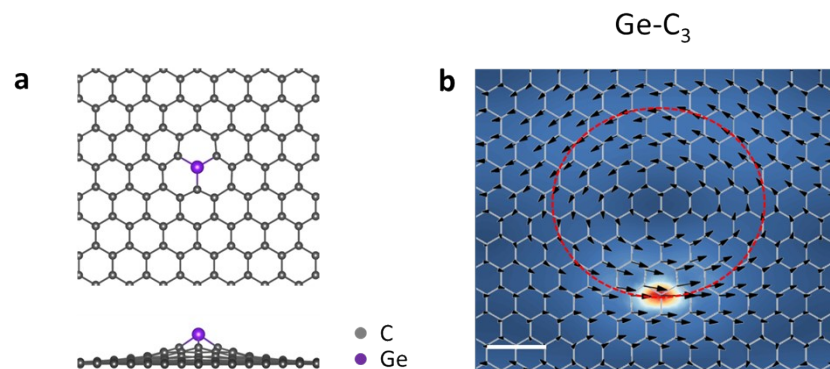

Figure S1. Phonon vortex in Ge-C<sub>3</sub> -- one C atom is replaced by one Ge atom, *i.e.*, an impurity atom that is larger and heavier than Si. Calculations were performed in a 12×12 supercell as in Figure 1d for Si-C<sub>3</sub> because of the computational cost, but the presence of a vortex is clear.

a) In-plane and side view schematics of the Ge-C<sub>3</sub> defect showing that the Ge atom buckles by 2.2 Å off the graphene plane, compared with the 1.8-Å buckling by Si in Si-C<sub>3</sub>. b) Atomic displacements around a Ge-C<sub>3</sub> defect at  $\hbar\omega = 26$  meV showing clearly that Ge generates a larger vortex than Si, as illustrated by the red circle that goes through the Ge site which is much larger than the corresponding red circle of the Si-C<sub>3</sub>-defect vortex in Fig. 1d. Another notable feature is that the atomic displacements of C atoms forming circles that are concentric with the red circle are pointing in the same direction, in contrast to the Si-C<sub>3</sub> defect, where the atomic displacements in the two red circles shown in Fig. 1 are in opposite directions. This feature is most likely related to the fact that the wavelength of the pristine-graphene mode that is in resonance with the Ge-C<sub>3</sub> vortex mode is much longer than in the case of the Si-C<sub>3</sub> vortex mode. Much larger computational supercells, perhaps even larger than 24×24 would be needed to explore these issues further with sufficient accuracy. Scale bar: 0.5 nm.
